# Supplementary material for: Metabolism of parathyroid organoids
Source: PubMed Central journal article supplement (PMC10364603; doi:10.3389/fendo.2023.1223312), 2023-07-10
Supplement: DataSheet_1.pdf [file DataSheet_1.pdf]

### Supplementary Table 1

| Measurement            | QC Pool Sample Assessment | HILIC neg |
|------------------------|---------------------------|-----------|
|                        |                           | % CV      |
| Process Variability    | Biotin – D2               | 11.43     |
|                        | Phenylalanine – D8        | 23.82     |
|                        | Lauryl carnitine – D3     | 15.98     |
| Instrument Variability | Tryptophan – D3           | 1.68      |
|                        | Inosine – 4N15            | 0.14      |

## Supplementary Table 2

| Pathways                                            | Total | Expect | Hits | Raw p    | Impact  |
|-----------------------------------------------------|-------|--------|------|----------|---------|
| Purine metabolism                                   | 65    | 2.18   | 10   | 3.28E-05 | 0.1352  |
| Aminoacyl-tRNA biosynthesis                         | 48    | 1.61   | 8    | 0.000125 | 0.16667 |
| Glyoxylate and dicarboxylate metabolism             | 32    | 1.07   | 6    | 0.000494 | 0.25927 |
| Phenylalanine metabolism                            | 10    | 0.34   | 3    | 0.00362  | 0.35714 |
| Phenylalanine, tyrosine and tryptophan biosynthesis | 4     | 0.13   | 2    | 0.006345 | 1       |
| Arginine biosynthesis                               | 14    | 0.47   | 3    | 0.009984 | 0.07614 |
| Alanine, aspartate and glutamate metabolism         | 28    | 0.94   | 4    | 0.012704 | 0.08654 |
| Cysteine and methionine metabolism                  | 33    | 1.11   | 4    | 0.022436 | 0.02184 |
| Citrate cycle (TCA cycle)                           | 20    | 0.67   | 3    | 0.027131 | 0.1817  |
| Ascorbate and aldarate metabolism                   | 8     | 0.27   | 2    | 0.027162 | 0       |
| beta-Alanine metabolism                             | 21    | 0.70   | 3    | 0.030917 | 0.05597 |
| Pyrimidine metabolism                               | 39    | 1.31   | 4    | 0.038904 | 0.18376 |
| Galactose metabolism                                | 27    | 0.91   | 3    | 0.059078 | 0.00228 |
| Glycine, serine and threonine metabolism            | 33    | 1.11   | 3    | 0.095865 | 0.46284 |
| Histidine metabolism                                | 16    | 0.54   | 2    | 0.098187 | 0.31147 |

### Supplementary Table 3

| Compound ID | Metabolite            | Anova (p)   | q Value    | Max Fold Change | Highest Mean | Lowest Mean |
|-------------|-----------------------|-------------|------------|-----------------|--------------|-------------|
| HMDB0000516 | Beta-D-Glucose        | 1.79E-07    | 1.30E-07   | 30.751          | PO           | PT          |
| HMDB0028817 | Glutamylglutamine     | 0.0237401   | 0.003757   | 2.146           | PO           | PT          |
| HMDB0000243 | Pyruvic acid          | 0.0069468   | 0.001214   | 2.102           | PT           | PO          |
| HMDB0000050 | Adenosine             | 3.80E-07    | 2.44E-07   | 37.397          | PT           | PO          |
| HMDB0001138 | NAG                   | 0.003444147 | 0.0006340  | 70.201          | PT           | PO          |
| HMDB0000812 | NAA                   | 0.032002278 | 0.0049310  | 8.1182          | PT           | PO          |
| HMDB0000912 | Succinyladenosine     | 4.24E-05    | 1.20E-05   | 164.489         | PT           | PO          |
| HMDB0000086 | Glycerophosphocholine | 7.17E-06    | 2.82E-06   | 36.037          | PT           | PO          |
| HMDB0000211 | myo-Inositol          | 3.85E-09    | 5.66E-09   | 5.934           | PT           | PO          |
| HMDB0000045 | AMP                   | 0.0047216   | 0.00085316 | 123.323         | PT           | PO          |
| HMDB0001586 | Glucose 1-phosphate   | 0.0001948   | 4.58E-05   | 7.917           | PT           | PO          |
| HMDB0001178 | ADP ribose            | 3.34E-06    | 1.54E-06   | 597.265         | PT           | PO          |

## Supplementary Table 4

| <b>Metabolite</b>        | <b>Anova (p)</b> | <b>q Value</b> | <b>Fold Change</b> | <b>Organoids<br/>Average ± Std Dev</b> | <b>Tissue<br/>Average ± Std Dev</b> |
|--------------------------|------------------|----------------|--------------------|----------------------------------------|-------------------------------------|
| N-Acetylorithine         | 1.08E-07         | 8.68E-08       | 12.40              | 4086.63 ± 1203.09                      | 329.3492 ± 108.25                   |
| Methionine sulfoxide     | 8.49E-07         | 4.92E-07       | 3.43               | 1986.464 ± 401.70                      | 578.7502 ± 93.50                    |
| N-Acetylglutamic acid    | 0.00344          | 0.00064        | 70.20              | 3877.897 ± 3790.54                     | 272235.2 ± 445147.2                 |
| L-Tryptophan             | 8.24E-05         | 2.16E-05       | 4.81               | 5408.283 ± 1436.00                     | 1123.168 ± 843.58                   |
| Citrulline               | 0.117393         | 0.0169         | 1.38               | 4971.899 ± 1475.61                     | 3584.13 ± 1747.75                   |
| N-Acetyl-L-aspartic acid | 0.0320           | 0.00499        | 8.11               | 11284.97 ± 2949.22                     | 91613.69 ± 81300.42                 |
| L-Arginine               | 1.35E-10         | 3.64E-10       | 15.63              | 352814.6 ± 74215.46                    | 22562.2 ± 2749.72                   |
| L-Cystine                | 2.73E-05         | 8.27E-06       | 128.41             | 78577.42 ± 21031.73                    | 611.9112 ± 711.79                   |
| L-Serine                 | 2.69E-06         | 1.3E-06        | 3.91               | 31314.52 ± 7230.47                     | 7996.221 ± 1804.73                  |
| L-Histidine              | 1.58E-08         | 1.89E-08       | 145.40             | 64466.53 ± 37166.2                     | 443.3447 ± 139.05                   |
| L-Phenylalanine          | 5.23E-09         | 7.32E-09       | 9.07               | 45068.67 ± 9042.44                     | 4966.138 ± 1014.74                  |
| L-Tyrosine               | 9.65E-07         | 5.48E-07       | 3.51               | 11268.32 ± 2090.98                     | 3207.043 ± 810.46                   |
| Glutamylglutamine        | 0.0237           | 0.0038         | 2.14               | 4609.788 ± 1075.63                     | 2147.602 ± 3808.84                  |
